# Supplementary material
Source: PubMed Central journal article supplement (PMC1904364)

Figure S1

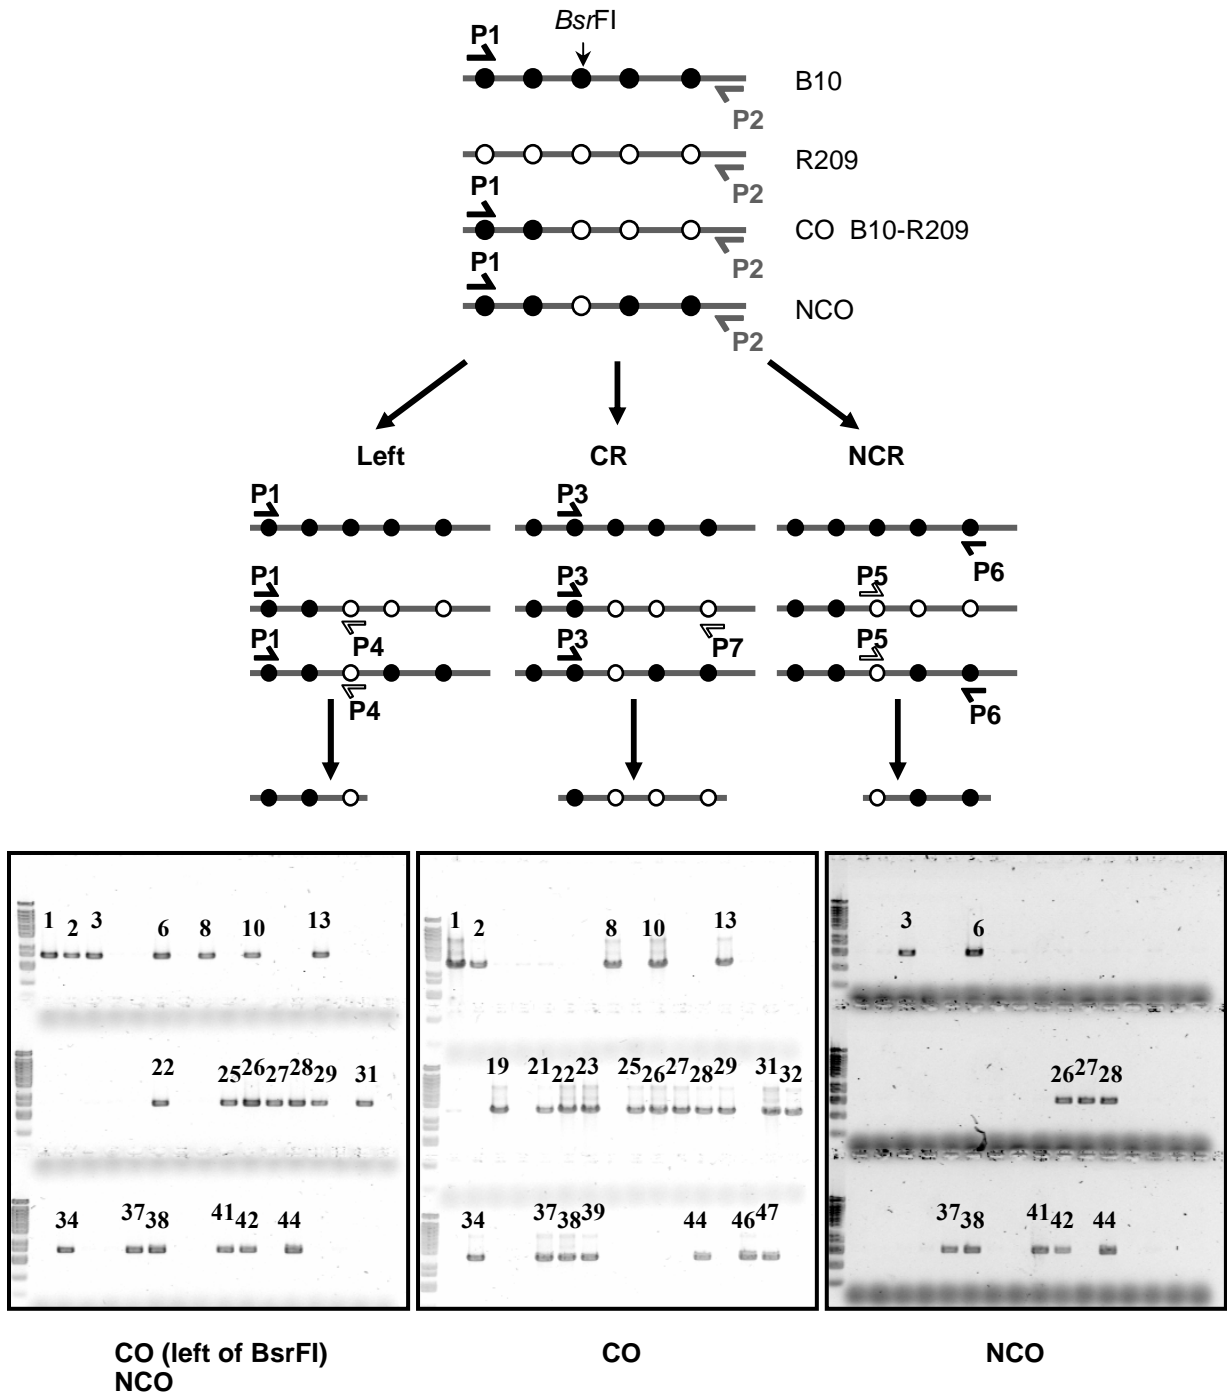

Supplement: pgen.0030100.sg001.pdf [file pgen.0030100.sg001.pdf]

Figure S2

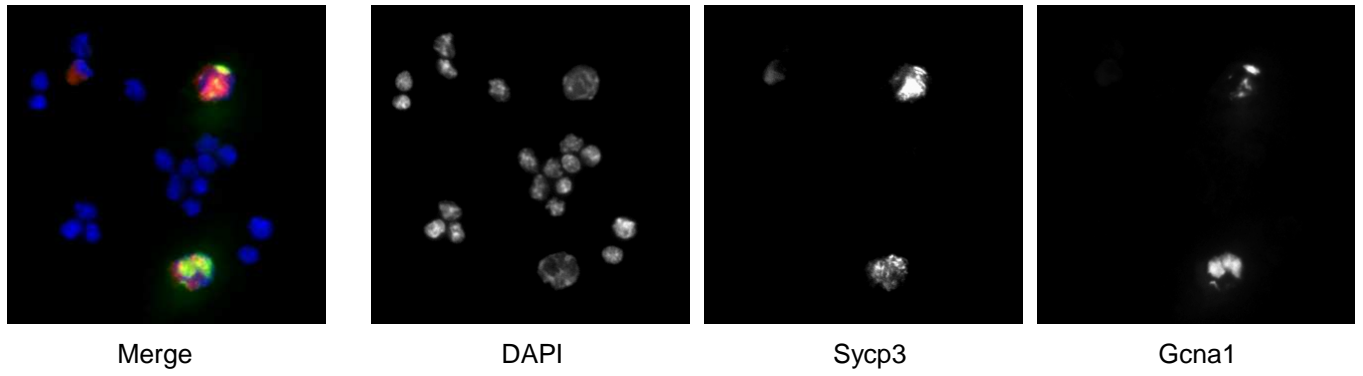

Supplement: pgen.0030100.sg002.pdf [file pgen.0030100.sg002.pdf]
